# Supplementary material
Source: publisher figshare collection journal article supplement (https://sage.figshare.com/ndownloader/files/18169004)
Supplement: Supplementary file 1 [file 18169004]

## Intervallic Awareness Test

Participant number\_\_\_\_\_

### Comparison

You are going to listen to a melody, and then 3 seconds later, a second melody is going to be played in a different tonality. You should compare them and answer if they are exact transpositions or not. Mark the box that you judge to be of best fit.

*Attention: the second melody will always be in a different tonality in regard to the first one. Still, they may or may not present the same absolute pattern of intervals.*

|         | Sure same | Same | Different | Sure different |
|---------|-----------|------|-----------|----------------|
| Example |           |      |           | X              |

|         | Sure same | Same | Different | Sure different |
|---------|-----------|------|-----------|----------------|
| Item 1  |           |      |           |                |
| Item 2  |           |      |           |                |
| Item 3  |           |      |           |                |
| Item 4  |           |      |           |                |
| Item 5  |           |      |           |                |
| Item 6  |           |      |           |                |
| Item 7  |           |      |           |                |
| Item 8  |           |      |           |                |
| Item 9  |           |      |           |                |
| Item 10 |           |      |           |                |
| Item 11 |           |      |           |                |
| Item 12 |           |      |           |                |
| Item 13 |           |      |           |                |
| Item 14 |           |      |           |                |
| Item 15 |           |      |           |                |
| Item 16 |           |      |           |                |
| Item 17 |           |      |           |                |
| Item 18 |           |      |           |                |
| Item 19 |           |      |           |                |
| Item 20 |           |      |           |                |
| Item 21 |           |      |           |                |
| Item 22 |           |      |           |                |
| Item 23 |           |      |           |                |
| Item 24 |           |      |           |                |
| Item 25 |           |      |           |                |

*\*audio files for the entire test are provided in midi format as supplementary material*

*Production This section of the test may be recorded and administered individually to each participant.*

## **Adding**

Eight melodies are going to be heard. You are required to add, at the end of each one, the melodic interval that is indicated in the box below. The interval must be sung from the last note of the excerpt.

*Attention: try to sing the interval respecting the melody's tempo.*

|                |              |
|----------------|--------------|
| <b>Example</b> | Minor second |
|----------------|--------------|

|               |                          |
|---------------|--------------------------|
| <b>Item 1</b> | Ascending perfect fourth |
| <b>Item 2</b> | Ascending major second   |
| <b>Item 3</b> | Ascending perfect fifth  |
| <b>Item 4</b> | Ascending major third    |
| <b>Item 5</b> | Ascending major second   |
| <b>Item 6</b> | Ascending major third    |
| <b>Item 7</b> | Ascending perfect fourth |
| <b>Item 8</b> | Ascending minor third    |

## **Inversion**

The items indicated below are composed of three notes that form two consecutive intervals. You are required to invert the order of those intervals and sing them from the same note indicated by the audio. Each item will be played 2 times, 5 seconds apart, and then you are going to have 15 seconds to sing your answer.

*Example: If the melodic excerpt presents a C, and, in sequence, the ascending intervals of Major Second and Minor Second, you should sing, from C, a Minor Second and a Major Second.*

|                                                                                      |       |
|--------------------------------------------------------------------------------------|-------|
| <b><u>Stimulus</u></b>                                                               | M2 m2 |
|   |       |
| <b><u>Response</u></b>                                                               | m2 M2 |
|  |       |



Ascending

**Item 1**

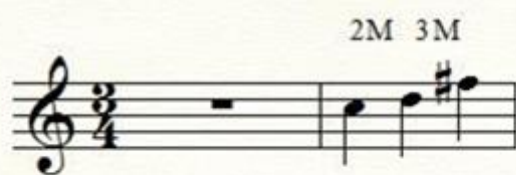

**Item 2**

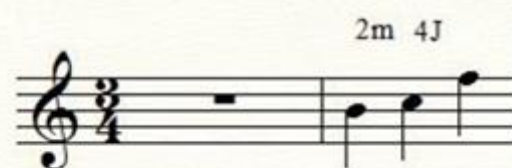

**Item 3**

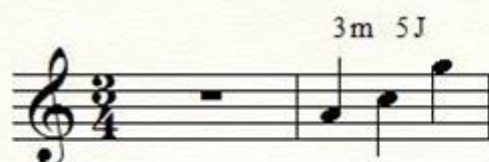

**Item 4**

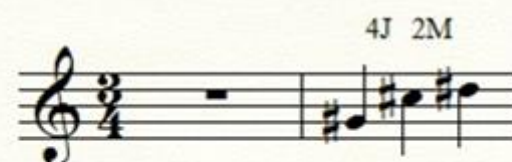

**Item 5**

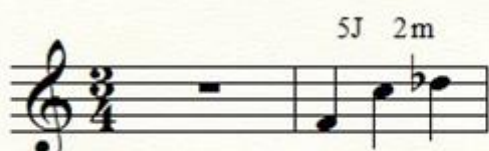

**Item 6**

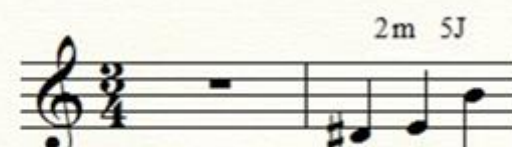

Descending

**Item 7**

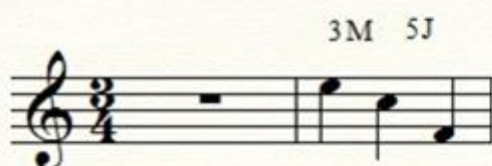

**Item 8**

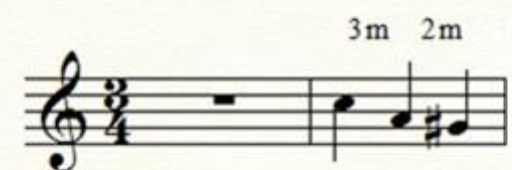

**Item 9**

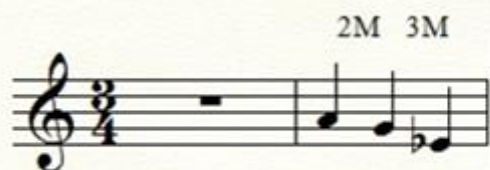

**Item 10**

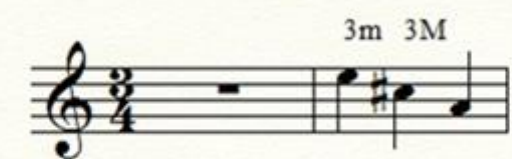

# Substitution

Each one of the six melodic excerpts will be heard two times. The intervals that you are going to listen are indicated over the boxes bellow and they correspond to the first and the second intervals, in that order. You are required to substitute the interval that you hear by the interval that is indicated at the second box.

*Attention: The second interval should remain unaltered.*

## Example:

Example: A melodic fragment in 3/4 time. The first staff shows a quarter rest followed by a quarter note G4, an eighth note A4, and an eighth note B4. Below the staff, the intervals are labeled as 3M↑ and 2M↑. The second staff shows the substitution: a quarter rest followed by a quarter note G4, an eighth note A4, and an eighth note A4. Below the staff, the intervals are labeled as 2M↑ and 2M↑.

Item 1

Item 1: A melodic fragment in 3/4 time. The first staff shows a quarter rest followed by a quarter note G4, an eighth note A4, and an eighth note B4. Below the staff, the intervals are labeled as 2m↑ and 2M↑. The second staff shows the substitution: a quarter rest followed by a quarter note G4, an eighth note A4, and an eighth note A4. Below the staff, the intervals are labeled as 2M↑ and 2M↑.

Item 2

Item 2: A melodic fragment in 3/4 time. The first staff shows a quarter rest followed by a quarter note G4, an eighth note A4, and an eighth note B4. Below the staff, the intervals are labeled as 5J↑ and 2m↑. The second staff shows the substitution: a quarter rest followed by a quarter note G4, an eighth note A4, and an eighth note G4. Below the staff, the intervals are labeled as 4J↑ and 2m↑.

Item 3

Item 3: A melodic fragment in 3/4 time. The first staff shows a quarter rest followed by a quarter note G4, an eighth note F#4, and an eighth note A4. Below the staff, the intervals are labeled as 3M↓ and 2M↑. The second staff shows the substitution: a quarter rest followed by a quarter note G4, an eighth note F#4, and an eighth note G4. Below the staff, the intervals are labeled as 3m↓ and 2M↑.

Item 4

Item 4: A melodic fragment in 3/4 time. The first staff shows a quarter rest followed by a quarter note G4, an eighth note A4, and an eighth note B4. Below the staff, the intervals are labeled as 3M↑ and 3M↑. The second staff shows the substitution: a quarter rest followed by a quarter note G4, an eighth note A4, and an eighth note B4. Below the staff, the intervals are labeled as 4J↑ and 3M↑.

Item 5

Item 5: A melodic fragment in 3/4 time. The first staff shows a quarter rest followed by a quarter note G4, an eighth note A4, and an eighth note B4. Below the staff, the intervals are labeled as 6M↑ and 2m↓. The second staff shows the substitution: a quarter rest followed by a quarter note G4, an eighth note A4, and an eighth note G4. Below the staff, the intervals are labeled as 2m↑ and 2m↓.

Item 6

Item 6: A melodic fragment in 3/4 time. The first staff shows a quarter rest followed by a quarter note G4, an eighth note A4, and an eighth note B4. Below the staff, the intervals are labeled as 4J↓ and 2M↑. The second staff shows the substitution: a quarter rest followed by a quarter note G4, an eighth note A4, and an eighth note G4. Below the staff, the intervals are labeled as 5J↓ and 2M↑.
